# Supplementary material for: Properties of Non-Aminoglycoside Compounds Used to Stimulate Translational Readthrough of PTC Mutations in Primary Ciliary Dyskinesia
Source: MDPI journal article supplement (doi:10.3390/ijms22094923), 2021-05-07
Supplement: s1 [file s1]

### Pre-screening cytotoxicity of NAGs in the 16HBE140- cell line

Based on the available literature data, five initial concentrations of each compound were tested on the human bronchial epithelial 16HBE140- cell line. Using a Trypan Blue cell exclusion dye assay, to indicate cytotoxicity (blue cells are compromised), we screened NAGs at a dose range previously reported [24,25,26,29,30,35] and found the three highest concentrations that permitted survival of >50% (arbitrarily judged by eye) of the 16HBE140- cells in submerged culture (Supp. table 1).

**Supp. table S1.** Exclusion of NAG concentrations that caused less than 50% 16HBE140- cell survival.

|                                                 |     |     |     |     |      |
|-------------------------------------------------|-----|-----|-----|-----|------|
| <b>Amlexanox</b><br>( $\mu$ M)<br>in DMSO       | 500 | 250 | 125 | 50  | 25   |
| <b>Azithromycin</b><br>( $\mu$ g/ml)<br>in DMSO | 50  | 25  | 10  | 5   | 2.5  |
| <b>Escin</b> ( $\mu$ M)<br>in MeOH              | 20  | 10  | 5   | 2.5 | 1.25 |
| <b>Tylosin</b><br>( $\mu$ g/mL)<br>in water     | 200 | 100 | 50  | 10  | N/A  |
| <b>Ataluren</b><br>( $\mu$ g/mL)<br>in DMSO     | 20  | 10  | 5   | 2.5 | N/A  |
| <b>TC007</b> ( $\mu$ g/mL)<br>in water          | 200 | 100 | 75  | N/A | N/A  |

NAG concentrations that caused less than 50% cell survival are shaded in grey. Diluents (dimethylsulfoxide (DMSO), methanol (MeOH), water) did not exceed 0.35% vol/vol. N/A – not analyzed.
